# Supplementary material for: Automatic Detection of Slow Slip Events Using the PICCA: Application to Chilean GNSS Data
Source: Frontiers journal article supplement (doi:10.3389/feart.2021.788054), 2021-12-24
Supplement: Image_3.PDF [file Image_3.PDF]

# Figure S3-A

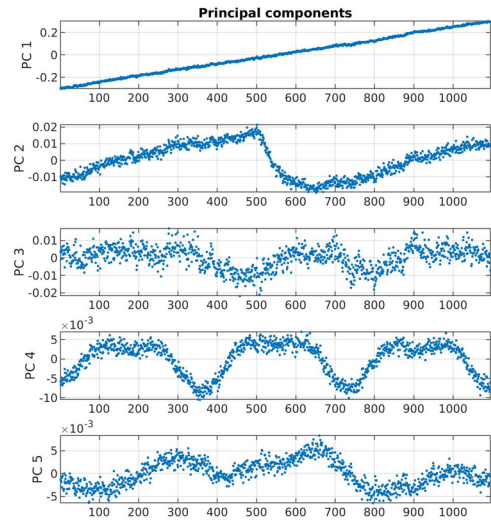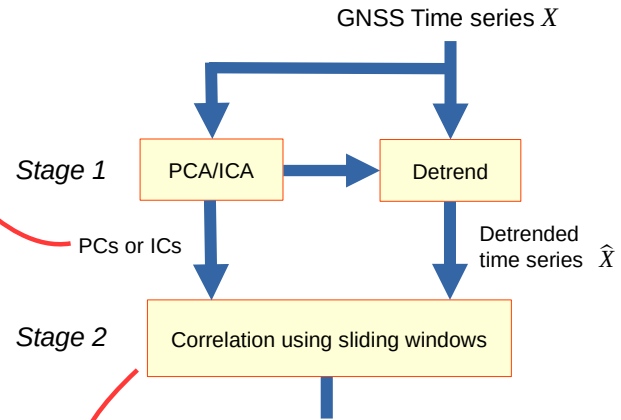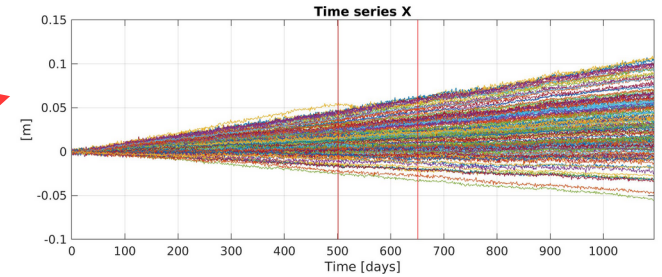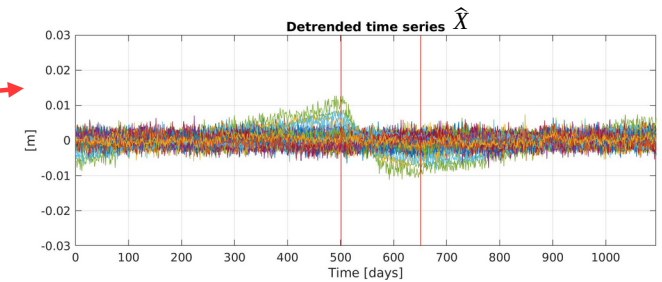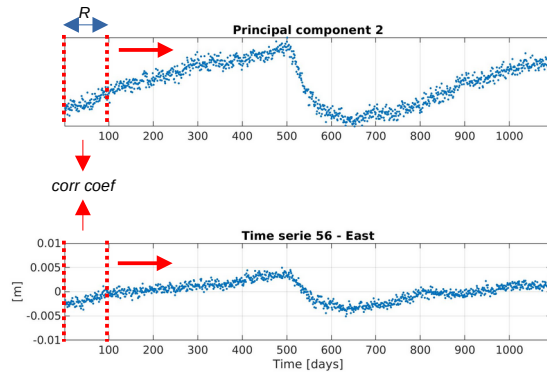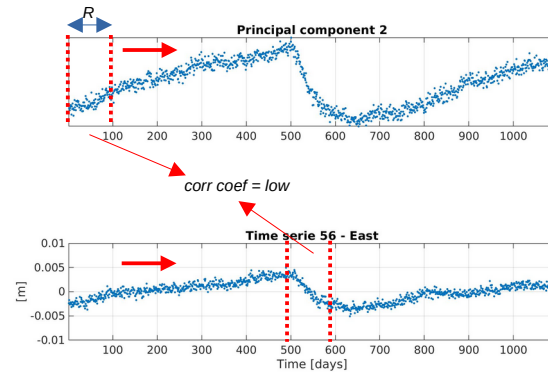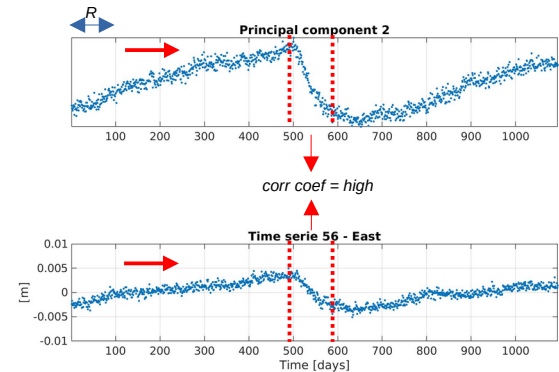

# Figure S3-B

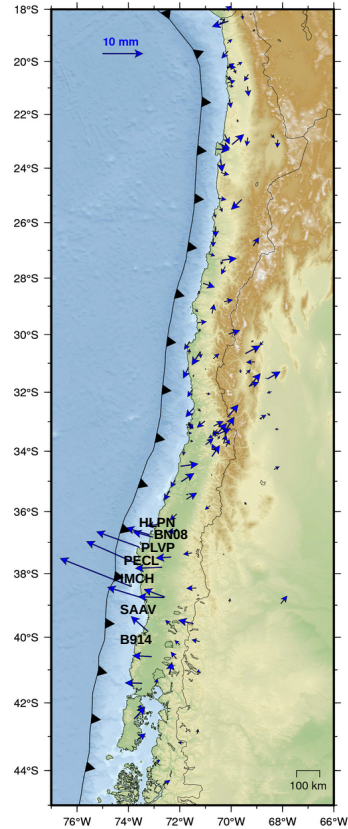

Stage 2

Correlation using sliding windows

Corr. matrices  $\rho_{kl}$

Stage 3

Search for maximum correlation time series

Matrix  $H_\rho$   
Time indexes

Stage 4

Clustering for temporal detection

Correlation-based iterative analysis for each PC or IC

Cluster of stations for each PC or IC

Stage 5

Component selection

PC or IC selected and corresponding stations

Stage 6

Spatial consistency check

Onset time, duration, and detected stations

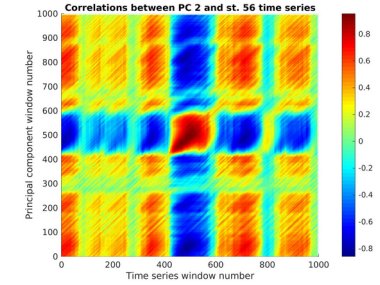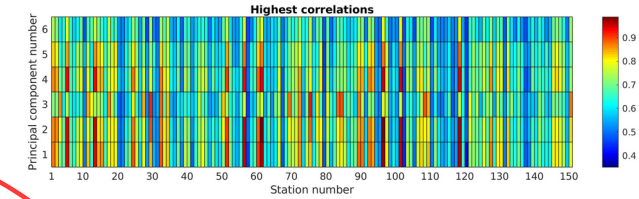

| Cluster for each PC |                                                      |                      |      |                                      |      |              |      |              |       |
|---------------------|------------------------------------------------------|----------------------|------|--------------------------------------|------|--------------|------|--------------|-------|
|                     | PC 2                                                 | PC 3                 | PC 4 | PC 5                                 | PC 6 | PC 7         | PC 8 | PC 9         | PC 10 |
| Stations in cluster | B914<br>BN08<br>HLPN<br>IMCH<br>PECL<br>PLVP<br>SAAV | CGSJ<br>CHMA<br>PVCA | SAAV | CLL1<br>CMBA<br>LSCH<br>PAZU<br>TAM3 | LME2 | PATH<br>TMCO | CHEN | BN08<br>SAAV | ILOC  |
| Onset times         | 481<br>485<br>489<br>484<br>482<br>496<br>496        | 693<br>712<br>700    | 745  | 646<br>655<br>667<br>652<br>660      | 212  | 343<br>342   | 233  | 525<br>525   | 599   |
